# Supplementary material for: Chromosome Evolution of the Liolaemus monticola (Liolaemidae) Complex: Chromosomal and Molecular Aspects
Source: MDPI journal article supplement (doi:10.3390/ani12233372), 2022-11-30
Supplement: s1 [file s1]

# Chromosome Evolution of the *Liolaemus monticola* (Liolaemidae) Complex: Chromosomal and Molecular Aspects

Madeleine Lamborot, Carmen Gloria Ossa, Nicolás Aravena-Muñoz, David Véliz and Raúl Araya-Donoso

## Supplementary Tables

**Table S1. Full data for the sampled individuals.** Unique identifier in the collection of the Evolutive Cytogenetic Laboratory (CUCH), sampling locality and coordinates, corresponding chromosome race: Southern (S), Northern (N), Northern Modified 1 (NM1), Multiple Fissions 1 (MF1), Multiple Fissions 2 (MF2) and Northern Modified 2 (NM2). Genebank accession numbers for mitochondrial *cytb* sequences, and chromosome alleles for first six macrochromosome pairs and microchromosome pair 7.

| ID   | Species                    | Locality     | Latitude   | Longitude  | Race | Genebank Accession Number | P1 | P2 | P3 | P4 | P5 | P6 | P7 |
|------|----------------------------|--------------|------------|------------|------|---------------------------|----|----|----|----|----|----|----|
| 727  | <i>Liolaemus monticola</i> | Salamanca    | -31.788889 | -70.971111 | NM2  | -                         | AA | AA | AF | AG | AA | AE | AA |
| 730  | <i>Liolaemus monticola</i> | Salamanca    | -31.788889 | -70.971111 | NM2  | -                         | AA | AA | AF | AG | AA | AE | AA |
| 817  | <i>Liolaemus monticola</i> | Salamanca    | -31.788889 | -70.971111 | NM2  | -                         | AA | AA | AF | AG | AA | AA | AA |
| 823  | <i>Liolaemus monticola</i> | Salamanca    | -31.788889 | -70.971111 | NM2  | -                         | AA | AA | AF | AG | AA | AA | AA |
| 1310 | <i>Liolaemus monticola</i> | Cantillana   | -33.909052 | -70.951620 | S    | AY851735                  | -  | -  | -  | -  | -  | -  | -  |
| 1311 | <i>Liolaemus monticola</i> | Cantillana   | -33.909052 | -70.951620 | S    | AY851736                  | -  | -  | -  | -  | -  | -  | -  |
| 1341 | <i>Liolaemus monticola</i> | Cantillana   | -33.909052 | -70.951620 | S    | OP886909                  | -  | -  | -  | -  | -  | -  | -  |
| 1354 | <i>Liolaemus monticola</i> | Hierro Viejo | -32.287500 | -71.020556 | MF2  | -                         | BB | DD | BB | BB | AA | EE | AA |
| 1356 | <i>Liolaemus monticola</i> | Hierro Viejo | -32.287500 | -71.020556 | MF2  | OP886911                  | AB | DD | BB | BB | AA | AE | AA |
| 1357 | <i>Liolaemus monticola</i> | Hierro Viejo | -32.287500 | -71.020556 | MF2  | -                         | BB | DD | AB | BB | AA | EE | AC |
| 1358 | <i>Liolaemus monticola</i> | Hierro Viejo | -32.287500 | -71.020556 | MF2  | -                         | BB | DD | BB | BB | AA | AA | AA |
| 1359 | <i>Liolaemus monticola</i> | Hierro Viejo | -32.287500 | -71.020556 | MF2  | -                         | BB | DD | AB | BB | AA | EE | CC |
| 1360 | <i>Liolaemus monticola</i> | Hierro Viejo | -32.287500 | -71.020556 | MF2  | -                         | BB | DD | AB | BB | AA | AA | AA |
| 1361 | <i>Liolaemus monticola</i> | Hierro Viejo | -32.287500 | -71.020556 | MF2  | -                         | BB | DD | BB | BB | AA | AA | AA |
| 1362 | <i>Liolaemus monticola</i> | Hierro Viejo | -32.287500 | -71.020556 | MF2  | -                         | AB | AD | BB | BB | AA | AE | AC |
| 1379 | <i>Liolaemus monticola</i> | Volcan Sur   | -33.800000 | -70.150000 | S    | AY851734                  | -  | -  | -  | -  | -  | -  | -  |
| 1386 | <i>Liolaemus monticola</i> | La Campana   | -32.950000 | -71.116667 | N    | AY851715                  | -  | -  | -  | -  | -  | -  | -  |
| 1439 | <i>Liolaemus monticola</i> | Yerba Loca   | -33.316667 | -70.333333 | N    | AY850618                  | -  | -  | -  | -  | -  | -  | -  |
| 1457 | <i>Liolaemus monticola</i> | La Dormida   | -33.050000 | -71.050000 | N    | AY851726                  | -  | -  | -  | -  | -  | -  | -  |
| 1459 | <i>Liolaemus monticola</i> | Los Queñes   | -35.000000 | -70.966667 | S    | -                         | AA |
| 1460 | <i>Liolaemus monticola</i> | Los Queñes   | -35.000000 | -70.966667 | S    | -                         | AA |
| 1464 | <i>Liolaemus monticola</i> | Los Queñes   | -35.000000 | -70.966667 | S    | -                         | AA |
| 1608 | <i>Liolaemus monticola</i> | Hierro Viejo | -32.287500 | -71.020556 | MF2  | -                         | BB | DD | BB | BB | AA | AA | AA |
| 1609 | <i>Liolaemus monticola</i> | Hierro Viejo | -32.287500 | -71.020556 | MF2  | -                         | BB | DD | AB | BB | AA | AA | AA |
| 1610 | <i>Liolaemus monticola</i> | Hierro Viejo | -32.287500 | -71.020556 | MF2  | -                         | BB | DD | AB | BB | AA | AA | AA |
| 1612 | <i>Liolaemus monticola</i> | Hierro Viejo | -32.287500 | -71.020556 | MF2  | -                         | BB | AD | BB | BB | AA | AA | AC |
| 1614 | <i>Liolaemus monticola</i> | Hierro Viejo | -32.287500 | -71.020556 | MF2  | -                         | BB | DD | BB | BB | AA | AE | CC |
| 1616 | <i>Liolaemus monticola</i> | Hierro Viejo | -32.287500 | -71.020556 | MF2  | -                         | BB | DD | AB | BB | AA | EE | AC |

|      |                            |              |            |            |     |          |    |    |    |    |    |    |    |
|------|----------------------------|--------------|------------|------------|-----|----------|----|----|----|----|----|----|----|
| 1617 | <i>Liolaemus monticola</i> | Hierro Viejo | -32.287500 | -71.020556 | MF2 | -        | BB | DD | BB | BB | AA | AE | AC |
| 1618 | <i>Liolaemus monticola</i> | Hierro Viejo | -32.287500 | -71.020556 | MF2 | -        | AB | DD | AB | BB | AA | AA | AA |
| 1619 | <i>Liolaemus monticola</i> | Hierro Viejo | -32.287500 | -71.020556 | MF2 | -        | BB | DD | AB | BB | AA | AA | AA |
| 1620 | <i>Liolaemus monticola</i> | Hierro Viejo | -32.287500 | -71.020556 | MF2 | -        | BB | DD | BB | BB | AA | AA | AA |
| 1646 | <i>Liolaemus monticola</i> | Yeso Sur     | -33.783333 | -70.216667 | S   | AY850620 | -  | -  | -  | -  | -  | -  | -  |
| 1660 | <i>Liolaemus monticola</i> | Yerba Loca   | -33.316667 | -70.333333 | N   | AY850619 | -  | -  | -  | -  | -  | -  | -  |
| 1719 | <i>Liolaemus monticola</i> | El Manzano   | -33.583333 | -70.400000 | N   | AY850617 | -  | -  | -  | -  | -  | -  | -  |
| 1807 | <i>Liolaemus monticola</i> | Hierro Viejo | -32.287500 | -71.020556 | MF2 | AY851705 | AB | DD | BB | BB | AA | EE | AA |
| 1808 | <i>Liolaemus monticola</i> | Hierro Viejo | -32.287500 | -71.020556 | MF2 | AY851704 | BB | DD | BB | BB | AA | AA | AA |
| 1809 | <i>Liolaemus monticola</i> | Hierro Viejo | -32.287500 | -71.020556 | MF2 | -        | BB | DD | BB | BB | AA | AE | AC |
| 1810 | <i>Liolaemus monticola</i> | Hierro Viejo | -32.287500 | -71.020556 | MF2 | OP886912 | AB | DD | BB | BB | AA | EE | AA |
| 1811 | <i>Liolaemus monticola</i> | Hierro Viejo | -32.287500 | -71.020556 | MF2 | -        | BB | DD | AB | BB | AA | EE | AA |
| 1812 | <i>Liolaemus monticola</i> | Hierro Viejo | -32.287500 | -71.020556 | MF2 | -        | BB | DD | AB | BB | AA | AE | CC |
| 1814 | <i>Liolaemus monticola</i> | Hierro Viejo | -32.287500 | -71.020556 | MF2 | OP886915 | BB | DD | BB | BB | AA | AE | AA |
| 1815 | <i>Liolaemus monticola</i> | Hierro Viejo | -32.287500 | -71.020556 | MF2 | OP886910 | BB | DD | BB | BB | AA | AA | AA |
| 1816 | <i>Liolaemus monticola</i> | Hierro Viejo | -32.287500 | -71.020556 | MF2 | -        | BB | DD | BB | BB | AA | AE | AA |
| 1817 | <i>Liolaemus monticola</i> | Hierro Viejo | -32.287500 | -71.020556 | MF2 | -        | BB | AD | AB | BB | AA | AE | AA |
| 1818 | <i>Liolaemus monticola</i> | Hierro Viejo | -32.287500 | -71.020556 | MF2 | -        | BB | AD | BB | BB | AA | EE | AC |
| 1862 | <i>Liolaemus monticola</i> | El Soldado   | -32.642222 | -71.110278 | MF2 | -        | BB | DD | AB | BB | AA | AA | AC |
| 1863 | <i>Liolaemus monticola</i> | El Soldado   | -32.642222 | -71.110278 | MF2 | -        | BB | DD | AB | BB | AA | AA | AA |
| 1864 | <i>Liolaemus monticola</i> | El Soldado   | -32.642222 | -71.110278 | MF2 | -        | BB | DD | AB | BB | AA | AA | CC |
| 1865 | <i>Liolaemus monticola</i> | El Soldado   | -32.642222 | -71.110278 | MF2 | -        | BB | DD | BB | BB | AA | AA | AC |
| 1866 | <i>Liolaemus monticola</i> | El Soldado   | -32.642222 | -71.110278 | MF2 | -        | BB | DD | AB | BB | AA | AA | CC |
| 1867 | <i>Liolaemus monticola</i> | El Soldado   | -32.642222 | -71.110278 | MF2 | -        | BB | DD | AB | BB | AA | AA | CC |
| 1868 | <i>Liolaemus monticola</i> | El Soldado   | -32.642222 | -71.110278 | MF2 | -        | BB | DD | BB | BB | AA | AA | CC |
| 1869 | <i>Liolaemus monticola</i> | El Soldado   | -32.642222 | -71.110278 | MF2 | -        | BB | DD | BB | BB | AA | AA | AC |
| 1870 | <i>Liolaemus monticola</i> | El Soldado   | -32.642222 | -71.110278 | MF2 | -        | BB | DD | BB | BB | AA | AE | AA |
| 1871 | <i>Liolaemus monticola</i> | El Soldado   | -32.642222 | -71.110278 | MF2 | -        | BB | DD | AB | BB | AA | AA | AA |
| 2090 | <i>Liolaemus monticola</i> | Rocín        | -32.513611 | -70.503611 | MF1 | OP886957 | BB | BD | BB | BB | AA | AE | AA |
| 2091 | <i>Liolaemus monticola</i> | Rocín        | -32.513611 | -70.503611 | MF1 | -        | AB | DD | BB | BB | AA | EE | AA |
| 2092 | <i>Liolaemus monticola</i> | Rocín        | -32.513611 | -70.503611 | MF1 | -        | BB | BD | BB | BB | AA | AA | AA |
| 2093 | <i>Liolaemus monticola</i> | Rocín        | -32.513611 | -70.503611 | MF1 | -        | AB | BD | BB | BB | AA | AA | AC |
| 2095 | <i>Liolaemus monticola</i> | Rocín        | -32.513611 | -70.503611 | MF1 | OP886963 | AB | BB | BB | BB | AA | AE | AA |
| 2096 | <i>Liolaemus monticola</i> | Rocín        | -32.513611 | -70.503611 | MF1 | OP886952 | AB | BD | BB | BB | AA | EE | AA |
| 2097 | <i>Liolaemus monticola</i> | Rocín        | -32.513611 | -70.503611 | MF1 | -        | AB | BB | BB | BB | AA | EE | AA |
| 2098 | <i>Liolaemus monticola</i> | Rocín        | -32.513611 | -70.503611 | MF1 | -        | BB | BD | AB | BB | AA | AE | AA |
| 2099 | <i>Liolaemus monticola</i> | Rocín        | -32.513611 | -70.503611 | MF1 | -        | AB | BB | BB | BB | AA | AA | AA |
| 2100 | <i>Liolaemus monticola</i> | Rocín        | -32.513611 | -70.503611 | MF1 | -        | AB | DD | AB | BB | AA | AA | AA |
| 2108 | <i>Liolaemus monticola</i> | Lontué       | -35.166667 | -71.166667 | S   | -        | AA |
| 2109 | <i>Liolaemus monticola</i> | Lontué       | -35.166667 | -71.166667 | S   | -        | AA |
| 2137 | <i>Liolaemus monticola</i> | Río Blanco   | -32.916667 | -70.266667 | NM1 | AY851712 | -  | -  | -  | -  | -  | -  | -  |
| 2170 | <i>Liolaemus monticola</i> | Chalaco      | -32.501111 | -70.582778 | MF1 | -        | AB | DD | AA | BB | AA | EE | AC |
| 2171 | <i>Liolaemus monticola</i> | Chalaco      | -32.501111 | -70.582778 | MF1 | -        | BB | BD | BB | BB | AA | EE | AC |
| 2172 | <i>Liolaemus monticola</i> | Chalaco      | -32.501111 | -70.582778 | MF1 | -        | AB | DD | BB | BB | AA | AE | AA |
| 2173 | <i>Liolaemus monticola</i> | Chalaco      | -32.501111 | -70.582778 | MF1 | -        | BB | BB | AB | BB | AA | EE | AA |
| 2174 | <i>Liolaemus monticola</i> | Rocín        | -32.513611 | -70.503611 | MF1 | OP886950 | BB | BD | BB | BB | AA | EE | AC |
| 2175 | <i>Liolaemus monticola</i> | Rocín        | -32.513611 | -70.503611 | MF1 | OP886953 | BB | AB | AB | BB | AA | AA | AC |
| 2176 | <i>Liolaemus monticola</i> | Rocín        | -32.513611 | -70.503611 | MF1 | -        | AB | BB | BB | BB | AA | AA | AA |
| 2177 | <i>Liolaemus monticola</i> | Rocín        | -32.513611 | -70.503611 | MF1 | -        | AB | BD | AA | BB | AA | AE | AA |
| 2178 | <i>Liolaemus monticola</i> | Rocín        | -32.513611 | -70.503611 | MF1 | -        | BB | BD | BB | BB | AA | AE | AA |
| 2180 | <i>Liolaemus monticola</i> | Rocín        | -32.513611 | -70.503611 | MF1 | -        | AB | BD | AB | BB | AA | AE | AC |
| 2181 | <i>Liolaemus monticola</i> | Rocín        | -32.513611 | -70.503611 | MF1 | OP886951 | BB | BB | BB | BB | AA | EE | CC |
| 2182 | <i>Liolaemus monticola</i> | Rocín        | -32.513611 | -70.503611 | MF1 | OP886948 | BB | BB | BB | BB | AA | AE | CC |
| 2183 | <i>Liolaemus monticola</i> | Rocín        | -32.513611 | -70.503611 | MF1 | OP886954 | BB | BD | BB | BB | AA | AA | AA |
| 2184 | <i>Liolaemus monticola</i> | Rocín        | -32.513611 | -70.503611 | MF1 | -        | AB | BB | BB | BB | AA | AA | AA |
| 2185 | <i>Liolaemus monticola</i> | Rocín        | -32.513611 | -70.503611 | MF1 | OP886949 | BB | BB | BB | BB | AA | AA | CC |
| 2211 | <i>Liolaemus monticola</i> | Chacabuco    | -32.966667 | -70.700000 | N   | AY851719 | -  | -  | -  | -  | -  | -  | -  |
| 2213 | <i>Liolaemus monticola</i> | Chacabuco    | -32.966667 | -70.700000 | N   | AY851718 | -  | -  | -  | -  | -  | -  | -  |
| 2227 | <i>Liolaemus monticola</i> | Culimó       | -32.069167 | -71.228611 | NM2 | OP886916 | -  | -  | -  | -  | -  | -  | -  |

|      |                            |                |            |            |     |          |    |    |    |    |    |    |    |
|------|----------------------------|----------------|------------|------------|-----|----------|----|----|----|----|----|----|----|
| 2228 | <i>Liolaemus monticola</i> | Culimó         | -32.069167 | -71.228611 | NM2 | OP886913 | -  | -  | -  | -  | -  | -  | -  |
| 2233 | <i>Liolaemus monticola</i> | Culimó         | -32.069167 | -71.228611 | NM2 | OP886914 | -  | -  | -  | -  | -  | -  | -  |
| 2236 | <i>Liolaemus monticola</i> | Tilama         | -32.072778 | -71.218056 | NM2 | OP886920 | -  | -  | -  | -  | -  | -  | -  |
| 2238 | <i>Liolaemus monticola</i> | Tilama         | -32.072778 | -71.218056 | NM2 | OP886918 | -  | -  | -  | -  | -  | -  | -  |
| 2286 | <i>Liolaemus monticola</i> | Saladillo      | -32.916667 | -70.166667 | N   | -        | AA | AA | AA | BB | AA | AA | AA |
| 2287 | <i>Liolaemus monticola</i> | Saladillo      | -32.916667 | -70.166667 | N   | -        | AA | AA | BB | BB | AA | AA | AA |
| 2288 | <i>Liolaemus monticola</i> | Saladillo      | -32.916667 | -70.166667 | N   | -        | AA | AA | BB | BB | AA | AA | AA |
| 2289 | <i>Liolaemus monticola</i> | Saladillo      | -32.916667 | -70.166667 | N   | -        | AA | AA | AB | BB | AA | AA | AA |
| 2290 | <i>Liolaemus monticola</i> | Saladillo      | -32.916667 | -70.166667 | N   | -        | AA | AA | BB | BB | AA | AA | AA |
| 2357 | <i>Liolaemus monticola</i> | Mina Cerrillos | -32.628333 | -70.940278 | MF2 | OP886943 | BB | DD | AB | BB | AA | AA | CC |
| 2358 | <i>Liolaemus monticola</i> | Mina Cerrillos | -32.628333 | -70.940278 | MF2 | AY851706 | BB | DD | AB | BB | AA | AE | AA |
| 2359 | <i>Liolaemus monticola</i> | Mina Cerrillos | -32.628333 | -70.940278 | MF2 | AY851707 | BB | DD | BB | BB | AA | AA | AA |
| 2360 | <i>Liolaemus monticola</i> | Mina Cerrillos | -32.628333 | -70.940278 | MF2 | OP886940 | BB | DD | BB | BB | AA | AA | CC |
| 2361 | <i>Liolaemus monticola</i> | Mina Cerrillos | -32.628333 | -70.940278 | MF2 | OP886944 | BB | DD | BB | BB | AA | AA | AA |
| 2362 | <i>Liolaemus monticola</i> | Mina Cerrillos | -32.628333 | -70.940278 | MF2 | -        | BB | DD | AB | BB | AA | AA | AA |
| 2364 | <i>Liolaemus monticola</i> | Mina Cerrillos | -32.628333 | -70.940278 | MF2 | OP886939 | AB | DD | BB | BB | AA | AA | AA |
| 2365 | <i>Liolaemus monticola</i> | Mina Cerrillos | -32.628333 | -70.940278 | MF2 | -        | BB | DD | AB | BB | AA | AA | AA |
| 2366 | <i>Liolaemus monticola</i> | Mina Cerrillos | -32.628333 | -70.940278 | MF2 | -        | BB | DD | BB | BB | AA | AA | AA |
| 2367 | <i>Liolaemus monticola</i> | Mina Cerrillos | -32.628333 | -70.940278 | MF2 | OP886942 | BB | DD | BB | BB | AA | EE | AA |
| 2368 | <i>Liolaemus monticola</i> | Mina Cerrillos | -32.628333 | -70.940278 | MF2 | OP886941 | BB | DD | AB | BB | AA | AA | AA |
| 2373 | <i>Liolaemus monticola</i> | Cabrería       | -32.823611 | -71.004722 | MF2 | -        | BB | DD | AB | BB | AA | AA | CC |
| 2374 | <i>Liolaemus monticola</i> | Cabrería       | -32.823611 | -71.004722 | MF2 | OP886947 | BB | DD | AA | BB | AA | AA | AC |
| 2375 | <i>Liolaemus monticola</i> | Cabrería       | -32.823611 | -71.004722 | MF2 | -        | BB | DD | AB | BB | AA | AA | AC |
| 2376 | <i>Liolaemus monticola</i> | Cabrería       | -32.823611 | -71.004722 | MF2 | AY851708 | BB | DD | AB | BB | AA | AE | CC |
| 2377 | <i>Liolaemus monticola</i> | Cabrería       | -32.823611 | -71.004722 | MF2 | OP886945 | BB | DD | AB | BB | AA | AE | AA |
| 2378 | <i>Liolaemus monticola</i> | Cabrería       | -32.823611 | -71.004722 | MF2 | -        | BB | DD | BB | BB | AA | AE | AA |
| 2379 | <i>Liolaemus monticola</i> | Cabrería       | -32.823611 | -71.004722 | MF2 | OP886946 | BB | DD | BB | BB | AA | EE | AA |
| 2382 | <i>Liolaemus monticola</i> | Lontué         | -35.166667 | -71.166667 | S   | AY851741 | AA |
| 2383 | <i>Liolaemus monticola</i> | Lontué         | -35.166667 | -71.166667 | S   | -        | AA |
| 2384 | <i>Liolaemus monticola</i> | Lontué         | -35.166667 | -71.166667 | S   | AY851740 | AA |
| 2385 | <i>Liolaemus monticola</i> | Lontué         | -35.166667 | -71.166667 | S   | -        | AA |
| 2386 | <i>Liolaemus monticola</i> | Lontué         | -35.166667 | -71.166667 | S   | -        | AA |
| 2387 | <i>Liolaemus monticola</i> | Lontué         | -35.166667 | -71.166667 | S   | -        | AA |
| 2388 | <i>Liolaemus monticola</i> | Lontué         | -35.166667 | -71.166667 | S   | -        | AA |
| 2447 | <i>Liolaemus monticola</i> | Saladillo      | -32.916667 | -70.166667 | N   | -        | AA | AA | AB | BB | AA | AA | AA |
| 2448 | <i>Liolaemus monticola</i> | Saladillo      | -32.916667 | -70.166667 | N   | -        | AA | AA | BB | BB | AA | AA | AA |
| 2449 | <i>Liolaemus monticola</i> | Saladillo      | -32.916667 | -70.166667 | N   | -        | AA | AA | AB | BB | AA | AA | AA |
| 2450 | <i>Liolaemus monticola</i> | Saladillo      | -32.916667 | -70.166667 | N   | -        | AA | AA | BB | BB | AA | AA | AA |
| 2451 | <i>Liolaemus monticola</i> | Saladillo      | -32.916667 | -70.166667 | N   | -        | AA | AA | AB | BB | AA | AA | AA |
| 2452 | <i>Liolaemus monticola</i> | Saladillo      | -32.916667 | -70.166667 | N   | OP886937 | AA | AA | AB | BB | AA | AA | AA |
| 2453 | <i>Liolaemus monticola</i> | Saladillo      | -32.916667 | -70.166667 | N   | AY851711 | AA | AA | AA | BB | AA | AA | AA |
| 2454 | <i>Liolaemus monticola</i> | Saladillo      | -32.916667 | -70.166667 | N   | -        | AA | AA | AA | BB | AA | AA | AA |
| 2455 | <i>Liolaemus monticola</i> | Saladillo      | -32.916667 | -70.166667 | N   | OP886938 | AA | AA | BB | BB | AA | AA | AA |
| 2456 | <i>Liolaemus monticola</i> | Saladillo      | -32.916667 | -70.166667 | N   | -        | AA | AA | BB | BB | AA | AA | AA |
| 2457 | <i>Liolaemus monticola</i> | Saladillo      | -32.916667 | -70.166667 | N   | -        | AA | AA | AB | BB | AA | AA | AA |
| 2458 | <i>Liolaemus monticola</i> | Saladillo      | -32.916667 | -70.166667 | N   | -        | AA | AA | AB | BB | AA | AA | AA |
| 2459 | <i>Liolaemus monticola</i> | Saladillo      | -32.916667 | -70.166667 | N   | -        | AA | AA | BB | BB | AA | AA | AA |
| 2460 | <i>Liolaemus monticola</i> | Saladillo      | -32.916667 | -70.166667 | N   | -        | AA | AA | AB | BB | AA | AA | AA |
| 2463 | <i>Liolaemus monticola</i> | Saladillo      | -32.916667 | -70.166667 | N   | -        | AA | AA | AB | BB | AA | AA | AA |
| 2465 | <i>Liolaemus monticola</i> | Saladillo      | -32.916667 | -70.166667 | N   | -        | AA | AA | AB | BB | AA | AA | AA |
| 2466 | <i>Liolaemus monticola</i> | Saladillo      | -32.916667 | -70.166667 | N   | -        | AA | AA | BB | BB | AA | AA | AA |
| 2467 | <i>Liolaemus monticola</i> | Saladillo      | -32.916667 | -70.166667 | N   | -        | AA | AA | AB | BB | AA | AA | AA |
| 2468 | <i>Liolaemus monticola</i> | Saladillo      | -32.916667 | -70.166667 | N   | -        | AA | AA | BB | BB | AA | AA | AA |
| 2474 | <i>Liolaemus monticola</i> | Saladillo      | -32.916667 | -70.166667 | N   | -        | AA | AA | BB | BB | AA | AA | AA |
| 2475 | <i>Liolaemus monticola</i> | Saladillo      | -32.916667 | -70.166667 | N   | -        | AA | AA | BB | BB | AA | AA | AA |
| 2508 | <i>Liolaemus monticola</i> | Salamanca      | -31.788889 | -70.971111 | NM2 | OP886929 | -  | -  | -  | -  | -  | -  | -  |
| 2509 | <i>Liolaemus monticola</i> | Salamanca      | -31.788889 | -70.971111 | NM2 | OP886930 | -  | -  | -  | -  | -  | -  | -  |
| 2511 | <i>Liolaemus monticola</i> | Salamanca      | -31.788889 | -70.971111 | NM2 | OP886924 | -  | -  | -  | -  | -  | -  | -  |
| 2539 | <i>Liolaemus monticola</i> | Colorado Norte | -32.871111 | -70.377778 | NM1 | -        | AA | AA | BB | BB | AA | AA | AA |

|      |                            |                |            |            |     |          |    |    |    |    |    |    |    |
|------|----------------------------|----------------|------------|------------|-----|----------|----|----|----|----|----|----|----|
| 2540 | <i>Liolaemus monticola</i> | Colorado Sur   | -32.900278 | -70.335556 | NM1 | -        | AA | AA | AA | BB | AA | AA | AA |
| 2541 | <i>Liolaemus monticola</i> | Colorado Sur   | -32.900278 | -70.335556 | NM1 | -        | AA | AA | BB | BB | AA | AE | AA |
| 2542 | <i>Liolaemus monticola</i> | Colorado Sur   | -32.900278 | -70.335556 | NM1 | -        | AA | AA | BB | BB | AA | AA | AA |
| 2543 | <i>Liolaemus monticola</i> | Colorado Norte | -32.871111 | -70.377778 | NM1 | OP886955 | AA | AA | BB | BB | AA | EE | AA |
| 2544 | <i>Liolaemus monticola</i> | Colorado Norte | -32.871111 | -70.377778 | NM1 | -        | AA | AA | BB | BB | AA | AA | AC |
| 2545 | <i>Liolaemus monticola</i> | Colorado Norte | -32.871111 | -70.377778 | NM1 | -        | AA | AA | BB | BB | AA | AA | AC |
| 2546 | <i>Liolaemus monticola</i> | Colorado Norte | -32.871111 | -70.377778 | NM1 | -        | AA | AA | BB | BB | AA | AE | AC |
| 2548 | <i>Liolaemus monticola</i> | Colorado Sur   | -32.900278 | -70.335556 | NM1 | OP886917 | AA | AA | BB | BB | AA | EE | AA |
| 2549 | <i>Liolaemus monticola</i> | Colorado Sur   | -32.900278 | -70.335556 | NM1 | -        | AA | AA | BB | BB | AA | AE | AA |
| 2550 | <i>Liolaemus monticola</i> | Colorado Sur   | -32.900278 | -70.335556 | NM1 | -        | AA | AA | BB | BB | AA | AA | CC |
| 2551 | <i>Liolaemus monticola</i> | Colorado Norte | -32.871111 | -70.377778 | NM1 | AY851713 | AA | AA | AB | BB | AA | AA | AC |
| 2552 | <i>Liolaemus monticola</i> | Colorado Norte | -32.871111 | -70.377778 | NM1 | -        | AA | AA | BB | BB | AA | AE | AA |
| 2553 | <i>Liolaemus monticola</i> | Colorado Norte | -32.871111 | -70.377778 | NM1 | -        | AA | AA | BB | BB | AA | AA | AC |
| 2554 | <i>Liolaemus monticola</i> | Colorado Norte | -32.871111 | -70.377778 | NM1 | -        | AA | AA | BB | BB | AA | AA | AA |
| 2555 | <i>Liolaemus monticola</i> | Colorado Norte | -32.871111 | -70.377778 | NM1 | -        | AA | AA | BB | BB | AA | AA | AC |
| 2556 | <i>Liolaemus monticola</i> | Colorado Norte | -32.871111 | -70.377778 | NM1 | -        | AA | AA | BB | BB | AA | AA | AC |
| 2557 | <i>Liolaemus monticola</i> | Colorado Norte | -32.871111 | -70.377778 | NM1 | -        | AA | AA | BB | BB | AA | AA | AA |
| 2559 | <i>Liolaemus monticola</i> | Colorado Sur   | -32.900278 | -70.335556 | NM1 | AY851714 | AA | AA | AA | BB | AA | AA | AC |
| 2560 | <i>Liolaemus monticola</i> | Colorado Sur   | -32.900278 | -70.335556 | NM1 | -        | AA | AA | BB | BB | AA | AA | CC |
| 2561 | <i>Liolaemus monticola</i> | Colorado Sur   | -32.900278 | -70.335556 | NM1 | -        | AA | AA | AB | BB | AA | AA | AC |
| 2562 | <i>Liolaemus monticola</i> | Colorado Sur   | -32.900278 | -70.335556 | NM1 | -        | AA | AA | BB | BB | AA | AA | AC |
| 2564 | <i>Liolaemus monticola</i> | Colorado Sur   | -32.900278 | -70.335556 | NM1 | OP886956 | AA | AA | BB | BB | AA | AA | AA |
| 2565 | <i>Liolaemus monticola</i> | Colorado Sur   | -32.900278 | -70.335556 | NM1 | -        | AA | AA | AB | BB | AA | AE | AA |
| 2567 | <i>Liolaemus monticola</i> | Colorado Sur   | -32.900278 | -70.335556 | NM1 | -        | AA | AA | AB | BB | AA | AE | CC |
| 2569 | <i>Liolaemus monticola</i> | Colorado Sur   | -32.900278 | -70.335556 | NM1 | -        | AA | AA | AA | BB | AA | AE | AA |
| 2570 | <i>Liolaemus monticola</i> | Colorado Sur   | -32.900278 | -70.335556 | NM1 | -        | AA | AA | AB | BB | AA | AA | AA |
| 2571 | <i>Liolaemus monticola</i> | Colorado Sur   | -32.900278 | -70.335556 | NM1 | -        | AA | AA | BB | BB | AA | AA | AA |
| 2572 | <i>Liolaemus monticola</i> | Colorado Sur   | -32.900278 | -70.335556 | NM1 | -        | AA | AA | BB | BB | AA | AA | AA |
| 2573 | <i>Liolaemus monticola</i> | Colorado Sur   | -32.900278 | -70.335556 | NM1 | -        | AA | AA | BB | BB | AA | AA | AA |
| 2579 | <i>Liolaemus monticola</i> | Colorado Sur   | -32.900278 | -70.335556 | NM1 | -        | AA | AA | BB | BB | AA | AA | CC |
| 2582 | <i>Liolaemus monticola</i> | Colorado Sur   | -32.900278 | -70.335556 | NM1 | -        | AA | AA | BB | BB | AA | AA | AC |
| 2583 | <i>Liolaemus monticola</i> | Los Queñes     | -35.000000 | -70.966667 | S   | -        | AA |
| 2584 | <i>Liolaemus monticola</i> | Los Queñes     | -35.000000 | -70.966667 | S   | -        | AA |
| 2585 | <i>Liolaemus monticola</i> | Los Queñes     | -35.000000 | -70.966667 | S   | -        | AA |
| 2613 | <i>Liolaemus monticola</i> | Colorado Norte | -32.871111 | -70.377778 | NM1 | -        | AA | AA | BB | BB | AA | AA | AA |
| 2614 | <i>Liolaemus monticola</i> | Colorado Norte | -32.871111 | -70.377778 | NM1 | -        | AA | AA | AB | BB | AA | AA | AA |
| 2615 | <i>Liolaemus monticola</i> | Colorado Norte | -32.871111 | -70.377778 | NM1 | -        | AA | AA | BB | BB | AA | AA | AA |
| 2616 | <i>Liolaemus monticola</i> | Colorado Norte | -32.871111 | -70.377778 | NM1 | -        | AA | AA | BB | BB | AA | AE | AC |
| 2617 | <i>Liolaemus monticola</i> | Colorado Norte | -32.871111 | -70.377778 | NM1 | -        | AA | AA | BB | BB | AA | AE | AC |
| 2619 | <i>Liolaemus monticola</i> | Colorado Norte | -32.871111 | -70.377778 | NM1 | -        | AA | AA | AB | BB | AA | EE | CC |
| 2620 | <i>Liolaemus monticola</i> | Colorado Norte | -32.871111 | -70.377778 | NM1 | -        | AA | AA | BB | BB | AA | AA | AA |
| 2622 | <i>Liolaemus monticola</i> | Colorado Norte | -32.871111 | -70.377778 | NM1 | -        | AA | AA | AB | BB | AA | EE | AC |
| 2623 | <i>Liolaemus monticola</i> | Colorado Norte | -32.871111 | -70.377778 | NM1 | -        | AA | AA | AB | BB | AA | EE | AC |
| 2638 | <i>Liolaemus monticola</i> | Los Queñes     | -35.000000 | -70.966667 | S   | AY851739 | -  | -  | -  | -  | -  | -  | -  |
| 2640 | <i>Liolaemus monticola</i> | Los Queñes     | -35.000000 | -70.966667 | S   | -        | AA |
| 2642 | <i>Liolaemus monticola</i> | Los Queñes     | -35.000000 | -70.966667 | S   | -        | AA |
| 2644 | <i>Liolaemus monticola</i> | Los Queñes     | -35.000000 | -70.966667 | S   | -        | AA |
| 2655 | <i>Liolaemus monticola</i> | Río Clarillo   | -33.716667 | -70.500000 | S   | AY851737 | -  | -  | -  | -  | -  | -  | -  |
| 2661 | <i>Liolaemus monticola</i> | Maipo Sur      | -33.800000 | -70.150000 | S   | AY851732 | -  | -  | -  | -  | -  | -  | -  |
| 2665 | <i>Liolaemus monticola</i> | Maipo Sur      | -33.800000 | -70.150000 | S   | AY851733 | -  | -  | -  | -  | -  | -  | -  |
| 2688 | <i>Liolaemus monticola</i> | La Dormida     | -33.050000 | -71.050000 | N   | AY851717 | -  | -  | -  | -  | -  | -  | -  |
| 2759 | <i>Liolaemus monticola</i> | Yeso Sur       | -33.783333 | -70.216667 | S   | AY851731 | -  | -  | -  | -  | -  | -  | -  |
| 2762 | <i>Liolaemus monticola</i> | Yeso Sur       | -33.783333 | -70.216667 | S   | AY851729 | -  | -  | -  | -  | -  | -  | -  |
| 2763 | <i>Liolaemus monticola</i> | Yeso Sur       | -33.783333 | -70.216667 | S   | AY851728 | -  | -  | -  | -  | -  | -  | -  |
| 2783 | <i>Liolaemus monticola</i> | Tilama         | -32.072778 | -71.218056 | NM2 | OP886919 | -  | -  | -  | -  | -  | -  | -  |
| 2784 | <i>Liolaemus monticola</i> | Tilama         | -32.072778 | -71.218056 | NM2 | OP886921 | -  | -  | -  | -  | -  | -  | -  |
| 2794 | <i>Liolaemus monticola</i> | El Roble       | -32.966667 | -71.000000 | N   | AY851716 | -  | -  | -  | -  | -  | -  | -  |
| 2834 | <i>Liolaemus monticola</i> | El Alfalfal    | -33.533333 | -70.266667 | N   | AY850616 | -  | -  | -  | -  | -  | -  | -  |
| 2841 | <i>Liolaemus monticola</i> | El Alfalfal    | -33.533333 | -70.266667 | N   | AY850615 | -  | -  | -  | -  | -  | -  | -  |

|      |                            |                |            |            |     |          |    |    |    |    |    |    |    |
|------|----------------------------|----------------|------------|------------|-----|----------|----|----|----|----|----|----|----|
| 2858 | <i>Liolaemus monticola</i> | Yeso Norte     | -33.783333 | -70.200000 | N   | AY851722 | -  | -  | -  | -  | -  | -  | -  |
| 2860 | <i>Liolaemus monticola</i> | Yeso Norte     | -33.783333 | -70.200000 | N   | AY850614 | -  | -  | -  | -  | -  | -  | -  |
| 2863 | <i>Liolaemus monticola</i> | Los Patos      | -32.508056 | -70.575000 | MF1 | -        | BB | DD | AB | BB | AA | -  | -  |
| 2865 | <i>Liolaemus monticola</i> | Los Patos      | -32.508056 | -70.575000 | MF1 | -        | AB | DD | AB | BB | AA | AE | AA |
| 2866 | <i>Liolaemus monticola</i> | Los Patos      | -32.508056 | -70.575000 | MF1 | OP886964 | BB | BD | BB | BB | AA | AE | AA |
| 2867 | <i>Liolaemus monticola</i> | Los Patos      | -32.508056 | -70.575000 | MF1 | OP886965 | BB | BB | BB | BB | AA | AE | AA |
| 2875 | <i>Liolaemus monticola</i> | Rocín          | -32.513611 | -70.503611 | MF1 | OP886962 | AB | DD | BB | BB | AA | AE | AA |
| 2876 | <i>Liolaemus monticola</i> | Chalaco        | -32.501111 | -70.582778 | MF1 | -        | BB | DD | AB | BB | AA | AE | AA |
| 2885 | <i>Liolaemus monticola</i> | Chalaco        | -32.501111 | -70.582778 | MF1 | -        | AB | BD | BB | BB | AA | AE | -  |
| 2886 | <i>Liolaemus monticola</i> | Chalaco        | -32.501111 | -70.582778 | MF1 | -        | AB | DD | BB | BB | AA | AE | AC |
| 2887 | <i>Liolaemus monticola</i> | Chalaco        | -32.501111 | -70.582778 | MF1 | -        | BB | BD | BB | BB | AA | EE | AA |
| 2888 | <i>Liolaemus monticola</i> | Chalaco        | -32.501111 | -70.582778 | MF1 | -        | AB | AD | BB | BB | AA | AA | AA |
| 2889 | <i>Liolaemus monticola</i> | Chalaco        | -32.501111 | -70.582778 | MF1 | OP886961 | BB | BD | BB | BB | AA | AA | AA |
| 2890 | <i>Liolaemus monticola</i> | Los Patos      | -32.508056 | -70.575000 | MF1 | -        | AB | DD | AB | BB | AA | AE | CC |
| 2927 | <i>Liolaemus monticola</i> | Tranquilla     | -31.951667 | -70.607222 | NM2 | OP886931 | -  | -  | -  | -  | -  | -  | -  |
| 2928 | <i>Liolaemus monticola</i> | Tranquilla     | -31.951667 | -70.607222 | NM2 | OP886934 | -  | -  | -  | -  | -  | -  | -  |
| 2930 | <i>Liolaemus monticola</i> | Tranquilla     | -31.951667 | -70.607222 | NM2 | OP886935 | -  | -  | -  | -  | -  | -  | -  |
| 2931 | <i>Liolaemus monticola</i> | Tranquilla     | -31.951667 | -70.607222 | NM2 | OP886933 | -  | -  | -  | -  | -  | -  | -  |
| 2942 | <i>Liolaemus monticola</i> | Tranquilla     | -31.951667 | -70.607222 | NM2 | OP886932 | -  | -  | -  | -  | -  | -  | -  |
| 2952 | <i>Liolaemus monticola</i> | Lo Vicuña      | -32.595000 | -70.740556 | MF1 | -        | BB | BB | BB | BB | AA | AA | CC |
| 2953 | <i>Liolaemus monticola</i> | Lo Vicuña      | -32.595000 | -70.740556 | MF1 | -        | BB | BD | AB | BB | AA | AE | AA |
| 2955 | <i>Liolaemus monticola</i> | Lo Vicuña      | -32.595000 | -70.740556 | MF1 | -        | AB | DD | BB | BB | AA | EE | AA |
| 2956 | <i>Liolaemus monticola</i> | Lo Vicuña      | -32.595000 | -70.740556 | MF1 | -        | BB | BD | AB | BB | AA | AA | AA |
| 2958 | <i>Liolaemus monticola</i> | Lo Vicuña      | -32.595000 | -70.740556 | MF1 | -        | AB | DD | AB | BB | AA | AA | AA |
| 2959 | <i>Liolaemus monticola</i> | Los Patos      | -32.508056 | -70.575000 | MF1 | -        | AB | BD | BB | BB | AA | AE | AC |
| 2960 | <i>Liolaemus monticola</i> | Los Patos      | -32.508056 | -70.575000 | MF1 | OP886958 | BB | BD | BB | BB | AA | -  | -  |
| 2961 | <i>Liolaemus monticola</i> | Los Patos      | -32.508056 | -70.575000 | MF1 | -        | AA | AD | BB | BB | AA | AE | AA |
| 2962 | <i>Liolaemus monticola</i> | Los Patos      | -32.508056 | -70.575000 | MF1 | OP886960 | BB | BD | BB | BB | AA | -  | AA |
| 2963 | <i>Liolaemus monticola</i> | Los Patos      | -32.508056 | -70.575000 | MF1 | -        | AB | AD | AB | BB | AA | AA | AA |
| 2964 | <i>Liolaemus monticola</i> | Los Patos      | -32.508056 | -70.575000 | MF1 | -        | AB | BD | AB | BB | AA | AE | AA |
| 2967 | <i>Liolaemus monticola</i> | Los Patos      | -32.508056 | -70.575000 | MF1 | -        | BB | DD | BB | BB | AA | EE | AC |
| 2970 | <i>Liolaemus monticola</i> | Lo Vicuña      | -32.595000 | -70.740556 | MF1 | OP886966 | BB | BD | AB | BB | AA | AE | -  |
| 2971 | <i>Liolaemus monticola</i> | Lo Vicuña      | -32.595000 | -70.740556 | MF1 | -        | BB | BD | AB | BB | AA | AA | AA |
| 2972 | <i>Liolaemus monticola</i> | Lo Vicuña      | -32.595000 | -70.740556 | MF1 | -        | BB | DD | AB | BB | AA | AA | -  |
| 2975 | <i>Liolaemus monticola</i> | Los Patos      | -32.508056 | -70.575000 | MF1 | OP886967 | BB | DD | BB | BB | AA | AE | AA |
| 2977 | <i>Liolaemus monticola</i> | Los Patos      | -32.508056 | -70.575000 | MF1 | OP886959 | BB | BD | BB | BB | AA | AE | CC |
| 2990 | <i>Liolaemus monticola</i> | Santa Virginia | -31.471944 | -70.786111 | NM2 | OP886927 | -  | -  | -  | -  | -  | -  | -  |
| 2991 | <i>Liolaemus monticola</i> | Santa Virginia | -31.471944 | -70.786111 | NM2 | OP886928 | AA | AA | AF | AG | AA | AE | AA |
| 2994 | <i>Liolaemus monticola</i> | Illapel        | -31.951944 | -70.607222 | NM2 | OP886926 | AA | AA | AF | AG | AA | AE | AA |
| 3010 | <i>Liolaemus monticola</i> | Chillepín      | -31.824444 | -70.860278 | NM2 | OP886925 | -  | -  | -  | -  | -  | -  | -  |
| 3083 | <i>Liolaemus monticola</i> | Chillepín      | -31.824444 | -70.860278 | NM2 | OP886923 | -  | -  | -  | -  | -  | -  | -  |
| 3098 | <i>Liolaemus monticola</i> | Salamanca      | -31.788889 | -70.971111 | NM2 | OP886922 | -  | -  | -  | -  | -  | -  | -  |
| 3266 | <i>Liolaemus monticola</i> | Colorado Sur   | -32.900278 | -70.335556 | NM1 | OP886936 | -  | -  | -  | -  | -  | -  | -  |
| 3304 | <i>Liolaemus monticola</i> | Siete Tazas    | -35.166667 | -71.166667 | S   | -        | AA |
| 3305 | <i>Liolaemus monticola</i> | Siete Tazas    | -35.166667 | -71.166667 | S   | -        | AA |
| 3306 | <i>Liolaemus monticola</i> | Siete Tazas    | -35.166667 | -71.166667 | S   | -        | AA |
| 3082 | <i>Liolaemus fuscus</i>    | Chillepín      | -31.824444 | -70.860278 | -   | MK472105 | -  | -  | -  | -  | -  | -  | -  |

## Supplementary Figures

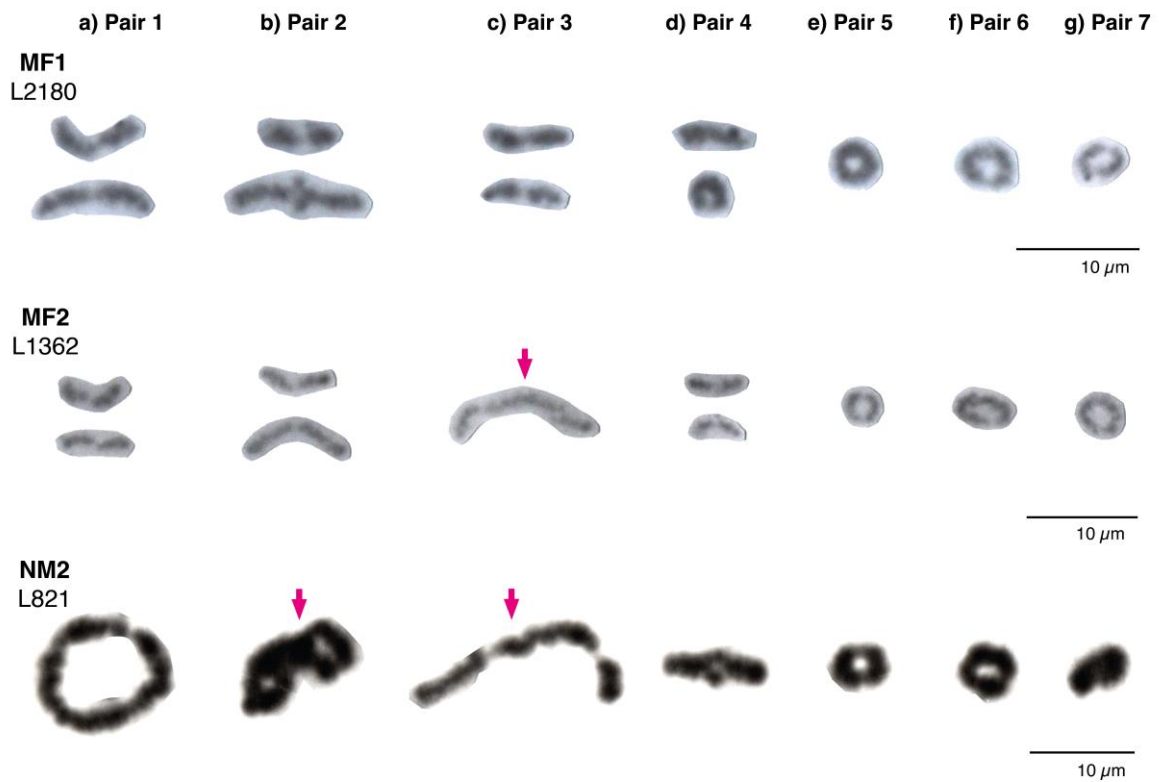

**Figure S1. Representative meiotic karyotype for the first seven chromosome pairs for lizards from the new described chromosomal races of *Liolaemus monticola*. Arrows indicate pair 2 with 3 chiasmata in (b) and pair 3 trivalents in (c).**

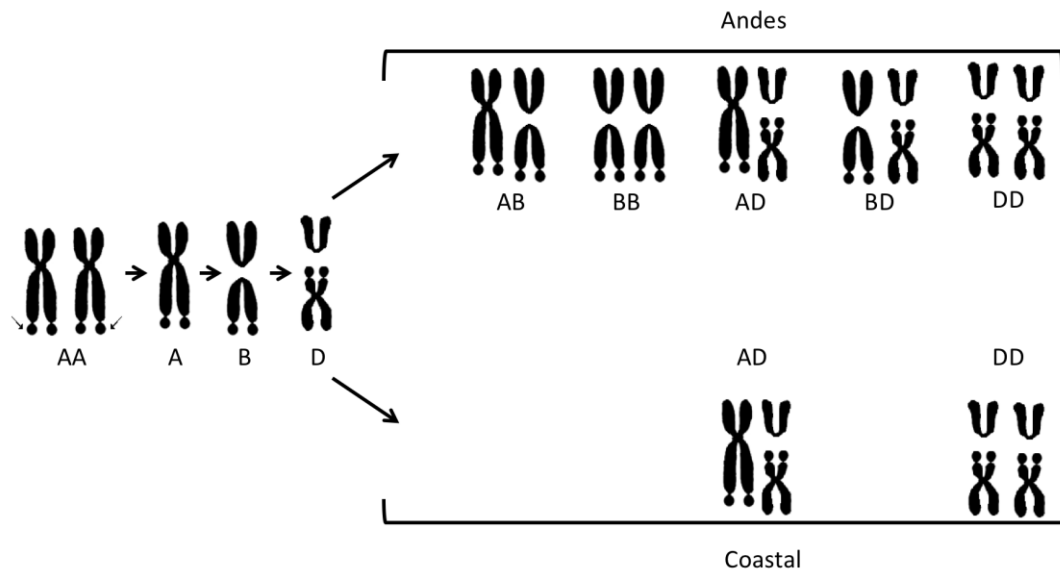

**Figure S2. Model of chromosome pair 2 evolution for *Liolaemus monticola* in the Multiple Fission races.** Note that in the Coastal range (MF2) the inversion product of pair 2 is fixated, whereas in the MF1 all the possible rearrangements occur.
